# Supplementary material
Source: Springer Nature journal article supplement (https://www.springermedizin.de/resource/supplementary/12891_2014_2196_MOESM6_ESM.pdf/9509598)

# Hospital length of stay

## Total hip replacement

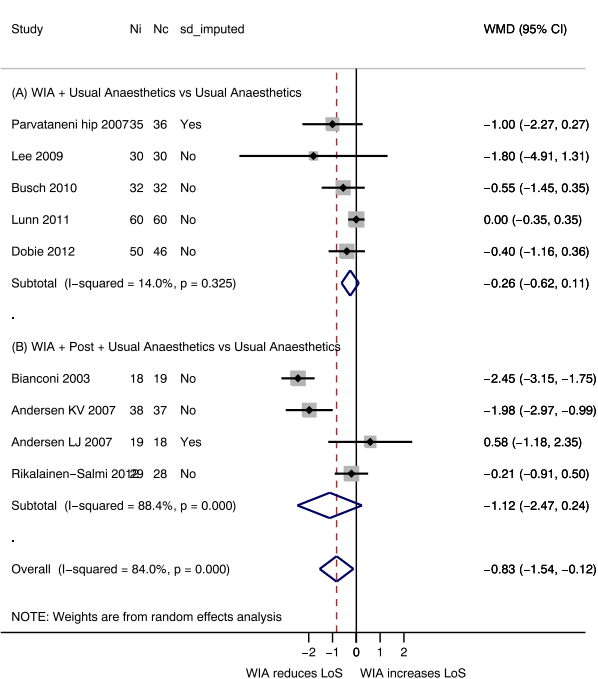

## Total knee replacement

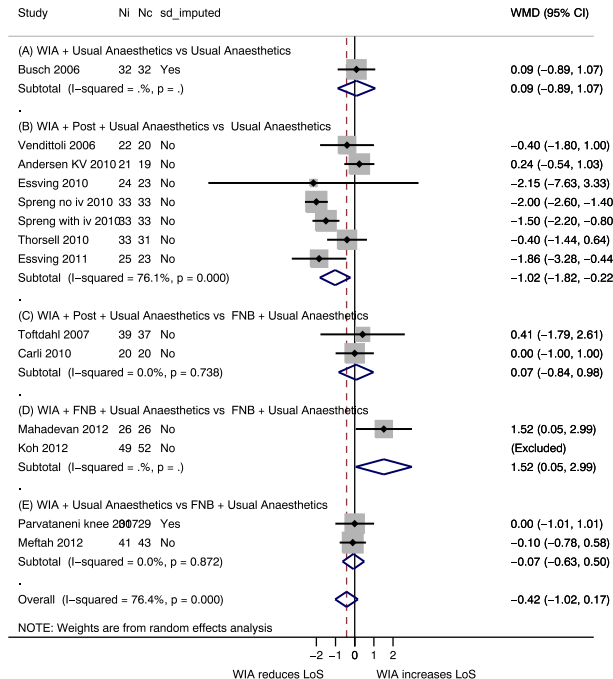

Mean difference in days

Supplement: MOESM6 [file 9509598]
